# Supplementary material for: The structural basis of Salmonella A2B5 toxin neutralization by antibodies targeting the glycan-receptor binding subunits
Source: PubMed Central journal article supplement — Cell Rep. Author manuscript; Available in PMC 2021 Sep 23. (PMC8459933; doi:10.1016/j.celrep.2021.109654), 2021-09-07
Supplement: NIHMS1738907-supplement-1.pdf [file NIHMS1738907-supplement-1.pdf]

**Supplemental information**

**The structural basis of *Salmonella* A<sub>2</sub>B<sub>5</sub>  
toxin neutralization by antibodies targeting  
the glycan-receptor binding subunits**

**Tri Nguyen, Angelene F. Richards, Durga P. Neupane, J. Ryan Feathers, Yi-An Yang, Ji Hyun Sim, Haewon Byun, Sohyoung Lee, Changhwan Ahn, Greta Van Slyke, J. Christopher Fromme, Nicholas J. Mantis, and Jeongmin Song**

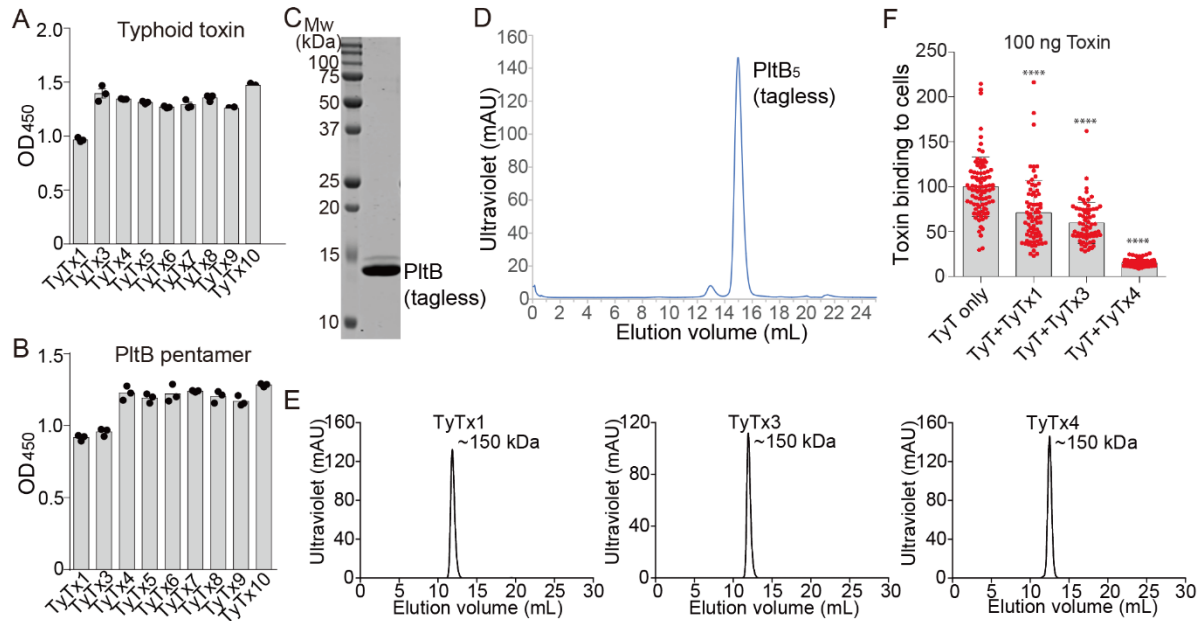

**Figure S1. MAb ELISAs, Size-exclusion chromatograms, MAb-mediated inhibition of typhoid toxin binding to Henle-407 cells, and purified recombinant tagless PltB, related to Fig. 1A-C and 4. A-B,** MAb ELISAs were performed to determine their specificities towards typhoid toxin (**A**) and tagless PltB pentamer (**B**). Bars represent the mean values of three replicates, which were obtained by measuring the absorbance at 450 nm. **C-D**, SDS-PAGE (**C**) and size-exclusion chromatograms (**D**) of purified recombinant PltB (tagless). See also the experimental procedure section for details. **E**, SD200 chromatograms of TyTx1 (left panel), TyTx3 (middle), and TyTx4 (right). Superdex 200 Increase prepacked columns (Cytiva) was used. **F**. Henle-407 cells grown on coverslips were precooled to 4°C, incubated with 100 ng of typhoid toxin-AF555 in the presence or absence of 2 µg MAb for 30 min, counterstained with DAPI, and analyzed by fluorescent microscopy. Bars represent the mean ± SEM obtained from at least three independent experiments. Each dot reflects the typhoid toxin signal intensity per image. n=60-88. \*\*\*\*, p<0.0001, compared to the TyT only group. Two-tailed unpaired t-tests were performed.

```

TyTx7LCVariable      -MGP HKLR ES LKMVSTPQFLVFLFWIPASRGDILLTQSPSILSVSPGERVVFSCRASQS
TyTx8LCVariable      -----MVSTPQFLVFLFWIPASRGDILLTQSPSILSVSPGERVVFSCRASQS
TyTx10LCVariable     -----MVSTPQFLVFLFWIPASRGDILLTQSPSILSVSPGERVVFSCRASQS
TyTx6LCVariable      -----MVSTPQFLVFLFWIPASRGDILLTQSPSILSVSPGERVVFSCRASQS
TyTx9LCVariable      MGGPHKLR ES LKMVSTPQFLVFLFWIPASRGDILLTQSPSILSVSPGERVVFSCRASQS
TyTx5LCVariable      MGGPHKLR ES LKMVSTPQFLVFLFWIPASRGDILLTQSPSILSVSPGERVVFSCRASQS
TyTx4LCVariable     MGGPHKLR ES LKMVSTPQFLVFLFWIPASRGDILLTQSPSILSVSPGERASFSCRASQS
TyTx3LCVariable      -----MRPSIQFLGLLFWLHGAQC DIQMTQSPSSLASLGGKVTITCKASQD
TyTx1LCVariable     -----MDSQAQVLIILLLLWVSGTCCD IVMQSPSSLAVSAGEKVTMSCKSSQS
                        *      *. * : ** : .      ** : : ** . * * : . * * : : * : : * :
TyTx7LCVariable      IG-----TSIHWYQQKPNQSPRLLIQYASQSI SGIPSRFSGSGSGTDFTLTINSVESED
TyTx8LCVariable      IG-----TSIHWYQQKPNQSPRLLIQYASQSI SGIPSRFSGSGSGTDFTLTINSVESED
TyTx10LCVariable     IG-----TSIHWYQQKPNQSPRLLIQYASQSI SGIPSRFSGSGSGTDFTLTINSVESED
TyTx6LCVariable      IG-----TSIHWYQQKPNQSPRLLIQYASQSI SGIPSRFSGSGSGTDFTLTINSVESED
TyTx9LCVariable      IG-----TSIHWYQQKPNQSPRLLIQYASQSI SGIPSRFSGSGSGTDFTLTINSVESED
TyTx5LCVariable      IG-----TSIHWYQQKPNQSPRLLIQYASQSI SGIPSRFSGSGSGTDFTLTINSVESED
TyTx4LCVariable     IG-----TSIHWYQQKPNQSPRLLIQYASQSI SGIPSRFSGSGSGTDFTLTINSVESED
TyTx3LCVariable      IN-----KYIAWYQHKPKGKPRLLIHYTSTLQPDIPSRFSGSGSGRDYSFISINLEPED
TyTx1LCVariable     LFNSRTRKNHLAWYQQKPGQSPKLLIYWASTGESGVPDRFTGSGSGTDFTLTISSVQAED
                        :      . : * : * : * : * : * : * : * : * : * : * : * : * : * : * : * : * :
TyTx7LCVariable      IADYYCQHTNGWPYTFGGGT TLEINRADAAPT VSI FPPSSEQLTSGGASVVCFLNNFYPK
TyTx8LCVariable      IADYYCQHTNGWPYTFGGGT TLEINRADAAPT VSI FPPSSEQLTSGGASVVCFLNNFYPK
TyTx10LCVariable     IADYYCQHN-GWPYTFGGGT TLEINRADAAPT VSI FPPSSEQLTSGGASVVCFLNNFYPK
TyTx6LCVariable      IADYYCQHTNGWPYTFGGGT TLEINRADAAPT VSI FPPSSEQLTSGGASVVCFLNNFYPK
TyTx9LCVariable      IADYYCQHTNGWPYTFGGGT TLEINRADAAPT VSI FPPSSEQLTSGGASVVCFLNNFYPK
TyTx5LCVariable      IADYYCQHTNGWPYTFGGGT TLEINRADAAPT VSI FPPSSEQLTSGGASVVCFLNNFYPK
TyTx4LCVariable     IADYYCQHTNGWPYTFGGGT TLEINRADAAPT VSI FPPSSEQLTSGGASVVCFLNNFYPK
TyTx3LCVariable      IATYYCLOYDTFLRTFGGGTKLEIKRADAAPT VSI FPPSSEQLTSGGASVVCFLNNFYPK
TyTx1LCVariable     LAVYFCQSYNRA LTFGSGTKLELKRADAAPT VSI FPPSSEQLTSGGASVVCFLNNFYPK
                        : * * : * :      * : * : * : * : * : * : * : * : * : * : * : * : * : * : * : * :
TyTx7LCVariable      DINVMVYLLLLKVKQNYSRGN-
TyTx8LCVariable      DINVMVYLLLLKVKQNYSEGIS
TyTx10LCVariable     DINVMVYLLLLKVKQNIREF--
TyTx6LCVariable      DINVMVYLLLLKVNKIFRGN--
TyTx9LCVariable      DINVMVYLLLLKVNKIFQRGIS
TyTx5LCVariable      DINVMVYLLLLKVKQNI RGS--
TyTx4LCVariable     DINVMVYLLLLKVNKIFRGEFR
TyTx3LCVariable      DINVMVYLLLLKVKQNIQREFL
TyTx1LCVariable     DINVMVYLLLLKVKQNYSGNS-
                        ***** : :

```

**Figure S2. Amino acid sequences of the light (kappa) chain variable region of TyTx1-10, related to Figs. 1-3.** Highlighted in bold are the MAbs whose epitopes have been defined via cryo-EM in this study. The first amino acid residues indicated in the cryo-EM structures deposited are highlighted in red. Amino acid residues that bind to the toxin are highlighted in cyan.

|                           |                                                                                                                                                             |
|---------------------------|-------------------------------------------------------------------------------------------------------------------------------------------------------------|
| TyTx5HeavyVariable        | MNFGPSLI FLVLILKGVQCEVKLVESGGGLVKPGGSLKLSCAASGFAFSTYDMSWVRQTP                                                                                               |
| TyTx10HeavyVariable       | MNFGPSLI FLVLILKGVQCEVKLVESGGGLVKPGGSLKLSCAASGFAFSTYDMSWVRQTP                                                                                               |
| TyTx9HeavyVariable        | MNFGPSLI FLVLILKGVQCEVKLVESGGGLVKPGGSLKLSCAASGFAFSTYDMSWVRQTP                                                                                               |
| TyTx6HeavyVariable        | MNFGPSLI FLVLILKGVQCEVKLVESGGGLVKPGGSLKLSCAASGFAFSTYDMSWVRQTP                                                                                               |
| TyTx8HeavyVariable        | MNFGPSLI FLVLILKGVQCEVKLVESGGGLVKPGGSLKLSCAASGFAFSTYDMSWVRQTP                                                                                               |
| TyTx7HeavyVariable        | MNFGPSLI FLVLILKGVQCEVKLVESGGGLVKPGGSLKLSCAASGFAFSTYDMSWVRQTP                                                                                               |
| <b>TyTx4HeavyVariable</b> | MNFGPSLI FLVLILKGVQCEV <b>K</b> LVESGGGLVKPGGSLKLSCAASGFAFSTY <b>D</b> MSWVRQTP                                                                             |
| <b>TyTx1HeavyVariable</b> | --MERRWFI FLV <b>L</b> GNAGMH <b>C</b> E <b>I</b> QSQQCGPELVKPGSSVKVSKASGYAFTNYKALGSKQSH                                                                    |
| TyTx3HeavyVariable        | MGWSCIIFFLVATATGVHSVQLQSQSGPEVVRPGVSVKISCKGSGYTFFTDYAMHWVKQSH<br>: : : : * : . : : : . : * : * : * * * : * : * : * : * : * : * :                            |
| TyTx5HeavyVariable        | EKRLEWVATISGGGSYTYYPDIVKGRFTISRDNARNTLYLQMSLRSSEDTALYFCVRQYY                                                                                                |
| TyTx10HeavyVariable       | EKRLEWVATISGGGSYTYYPDIVKGRFTISRDNARNTLYLQMSLRSSEDTALYFCVRQYY                                                                                                |
| TyTx9HeavyVariable        | EKRLEWVATISGGGSYTYYPDIVKGRFTISRDNARNTLYLQMSLRSSEDTALYFCVRQYY                                                                                                |
| TyTx6HeavyVariable        | EKRLEWVATISGGGSYTYYPDIVKGRFTISRDNARNTLYLQMSLRSSEDTALYFCVRQYY                                                                                                |
| TyTx8HeavyVariable        | EKRLEWVATISGGGSYTYYPDIVKGRFTISRDNARNTLYLQMSLRSSEDTALYFCVRQYY                                                                                                |
| TyTx7HeavyVariable        | EKRLEWVATISGGGSYTYYPDIVKGRFTISRDNARNTLYLQMSLRSSEDTALYFCVRQYY                                                                                                |
| <b>TyTx4HeavyVariable</b> | EKRLEWVATISGGGSYTYYPDIVKGRFTISRDNARNTLYLQMSLRSSEDTALYFCVRQYY                                                                                                |
| <b>TyTx1HeavyVariable</b> | GKSLEWIGY <b>I</b> DP <b>Y</b> NS <b>D</b> S <b>Y</b> NP <b>Q</b> FKDKATLTVDKSSSTAYMYLNSLTSSEDSAVYYCAG--L                                                   |
| TyTx3HeavyVariable        | AKSLEWIGIVISTYTGNTKYNQNFKGKATMTVDKSSSTAYMELARLTSSEDSAIYYCARNYR<br>* * * * . : * . . : * : . * . : * : * : * : * : * : * : * * * * . : * * * * . : * * * * . |
| TyTx5HeavyVariable        | GSSNYGMDYWQGQTSVTVSSAKTTAPSVYPLAPVCGDTTGSSVTLGCLVKGYFPEPVTLT                                                                                                |
| TyTx10HeavyVariable       | GSSNYGMDYWQGQTSVTVSSAKTTAPSVYPLAPVCGDTTGSSVTLGCLVKGYFPEPVTLT                                                                                                |
| TyTx9HeavyVariable        | GSSNYGMDYWQGQTSVTVSSAKTTAPSVYPLAPVCGDTTGSSVTLGCLVKGYFPEPVTLT                                                                                                |
| TyTx6HeavyVariable        | GSSNYGMDYWQGQTSVTVSSAKTTAPSVYPLAPVCGDTTGSSVTLGCLVKGYFPEPVTLT                                                                                                |
| TyTx8HeavyVariable        | GSSNYGMDYWQGQTSVTVSSAKTTAPSV-----                                                                                                                           |
| TyTx7HeavyVariable        | GSSNYGMDYWQGQTSVTVSSAKTTAPSVYPLAPVCGDTTGSSVTLGCLVKGYFPEPVTLT                                                                                                |
| <b>TyTx4HeavyVariable</b> | GSS <b>N</b> YGMDYWQGQTSVTVSSAKTTAPSVYPLAPVCGDTTGSSVTLGCLVKGYFPEPVTLT                                                                                       |
| <b>TyTx1HeavyVariable</b> | ELTG-TLPYWQGQTLVTVSSAKTTAPSVYPTGPWICPN-----                                                                                                                 |
| TyTx3HeavyVariable        | YDGEYYFDYWQGQTTTLTVSSAKTTAPSVYPLAPGSAAQTNMVTLGCLVKGYFPEPVTVI<br>: * * * * * : * * * * * . * * * *                                                           |
| TyTx5HeavyVariable        | S--GSPWYISFLK-----                                                                                                                                          |
| TyTx10HeavyVariable       | S--GSPWYISFLKLNKIFEF--                                                                                                                                      |
| TyTx9HeavyVariable        | S--GSPWYISFLK-----                                                                                                                                          |
| TyTx6HeavyVariable        | W--IPMVYLLKVNKIFRGNF-                                                                                                                                       |
| TyTx8HeavyVariable        | -----                                                                                                                                                       |
| TyTx7HeavyVariable        | -----                                                                                                                                                       |
| <b>TyTx4HeavyVariable</b> | WNSGSPWYISFLK-----                                                                                                                                          |
| <b>TyTx1HeavyVariable</b> | -----                                                                                                                                                       |
| TyTx3HeavyVariable        | LDPHGISPS-----                                                                                                                                              |

**Figure S3. Amino acid sequences of the heavy chain variable region of TyTx1-10, related to Figs. 1-3.** Highlighted in bold are the antibodies whose epitopes have been defined via cryo-EM in this study. The first amino acid residues indicated in the cryo-EM structures deposited are highlighted in red. Amino acid residues that bind to the toxin are highlighted in purple.

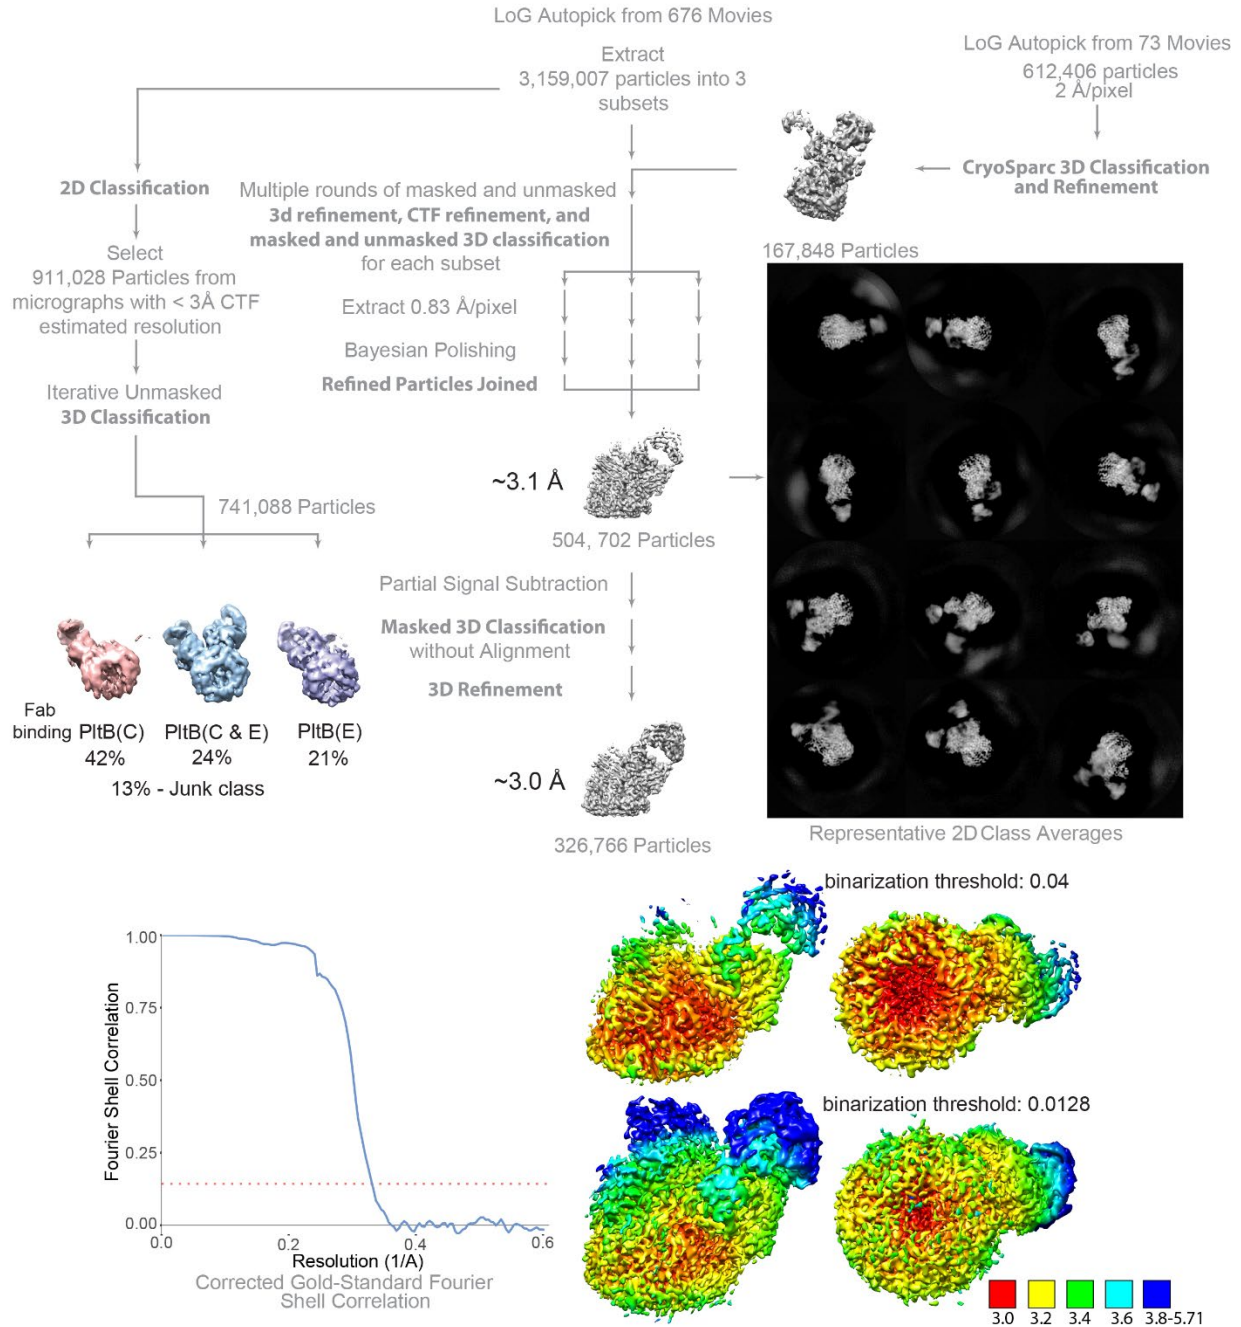

**Figure S4. Flow chart depicting the cryo-EM workflow of the TyTx1 Fab-toxin complexes, related to Fig. 2.** Details are described in the experimental procedure section under cryo-EM, data collection, and structure determination. Color-coded local resolution map is shown on the bottom right. The resolution map generated using 'binarization threshold=0.04' (top panel) is shown in the flow chart, while the map generated using 'binarization threshold=0.0128' is shown in the bottom panel that matches with Fig. 2B. Note that the FSC curve remains the same because the FSC curve was generated as part of post-processing of cryo-EM image refinement before any visualization steps for preparing figure panels. The appearance of the resolution maps can be different depending on the 'binarization threshold' value used during visualization. The local resolution maps were generated by Relion and visualized by Chimera.



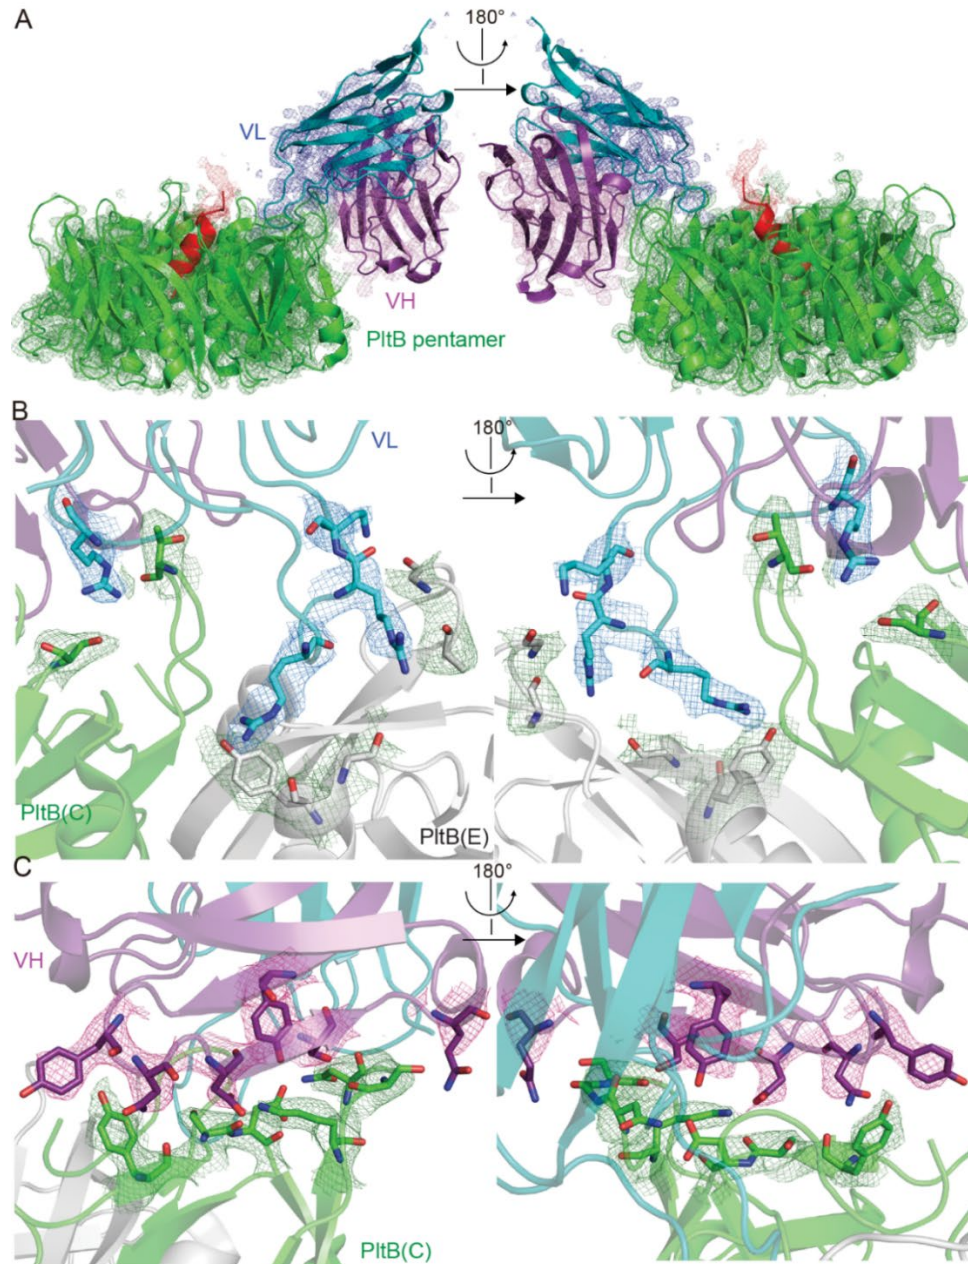

**Figure S5. Cryo-EM density maps of typhoid toxin PltB pentamer bound to TyTx1 Fab variable regions, related to Fig. 2B-E.** **A**, Overall cryo-EM density maps of PltB pentamer bound to TyTx1 variable regions of the light chain (VL, blue) and the heavy chain (VH, purple). The red helix is the tail part/C-terminal  $\alpha$ -helix of PltA. **B-C**, Density maps of the interface between PltB subunits (C chain, green and E chain, grey) and TyTx1 VL (blue) (**B**) and between PltB subunits and TyTx1 VH (purple) (**C**). The density mesh was generated through Pymol based on the CryoEM density map around the built molecular structure. Color-coded local resolution map is shown in Fig S4, explaining the missing density in some parts.

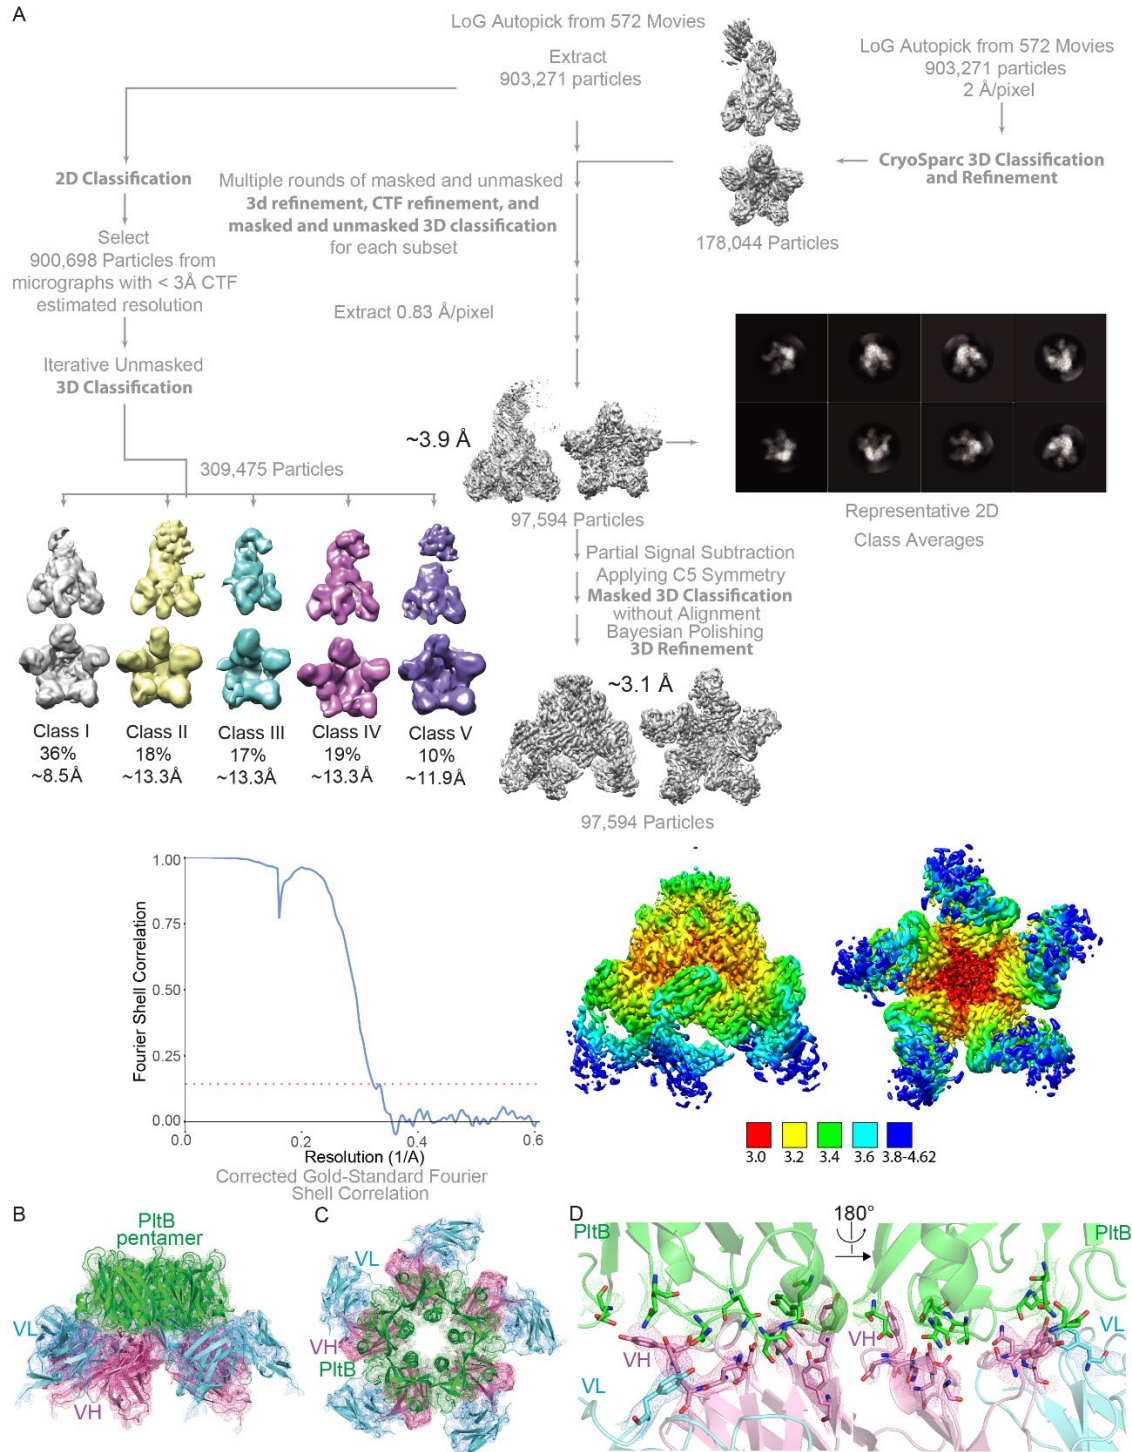

**Figure S6. Cryo-EM workflow of the TyTx4 Fab-toxin complexes and cryo-EM density maps, related to Fig. 3A-D.** **A**, Cryo-EM workflow. Details are described in the experimental procedure section under cryo-EM, data collection, and structure determination. Color-coded local resolution map is shown on the bottom right. **B-C**, Side (**B**) and top views (**C**) of overall cryo-EM density maps of PitB pentamer bound to TyTx4 variable regions of the light chain (VL, light blue) and the heavy chain (VH, pink). **D**, Density maps of the interface between PitB pentamer (green) and TyTx4 VL (light blue) and VH (pink). The density mesh was generated through Pymol based on the CryoEM density map around the built molecular structure.



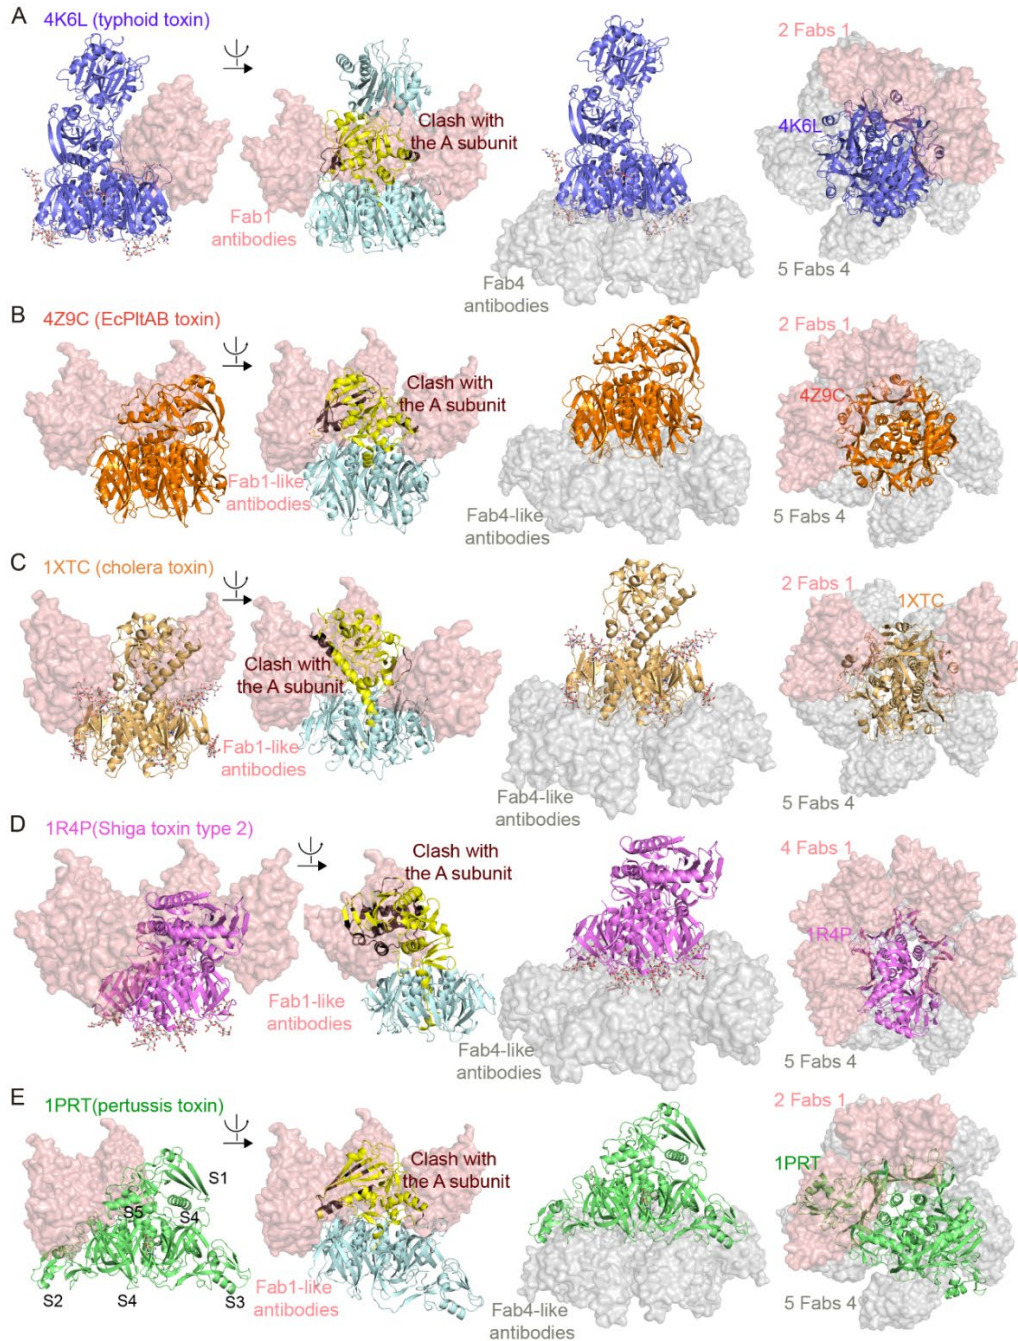

**Figure S7. Secondary structure matching (SSM) analyses of bacterial AB<sub>5</sub> toxins, related to Fig. 7.** A-E, Typhoid toxin (A), *E. coli* PltAB toxin (B), cholera toxin (C), Shiga toxin type 2 (D), and pertussis toxin (E) are complexed with TyTx1 Fabs (pink volume) and TyTx4 Fabs (grey volume). The region of toxin encroaching the TyTx1 Fab volume was manually identified and highlighted in brown (clashes with the A subunit in yellow). Total numbers of Fabs that can bind to the indicated toxins without clashes are indicated in the top view images that overlay toxin, Fabs of TyTx1, and Fabs of TyTx4 (the far right panel). Glycan receptor moieties are also indicated if known; See also Table S5. Note that unlike all other A<sub>2</sub>B<sub>5</sub> toxins investigated in this manuscript (where up to 2 Fabs 1 or up to 5 Fabs 4 can fit in), our SSM analyses predict that 4 Fabs 1 or 5 Fabs 4 can fit in the region around the B subunit of Shiga toxin without clashes. We hypothesize that the A-subunit mediated asymmetry combined with a relatively smaller Shiga toxin contributes to this prediction result. This theoretical prediction appears to be highly conservative based on a recent observation by Bernedo-Navarro and colleagues (Bernedo-Navarro et al., 2018).



**Table S1. Cryo-EM data collection, refinement, and validation statistics, related to Figs. 2-3.**

|                                                  | TyTx1-Toxin Complex<br>(EMDB-22699)<br>(PDB 7K7H) | TyTx4-Toxin Complex<br>(EMDB-22700)<br>(PDB 7K7I) |
|--------------------------------------------------|---------------------------------------------------|---------------------------------------------------|
| <b>Data collection and processing</b>            |                                                   |                                                   |
| Magnification                                    | 49,000                                            | 49,000                                            |
| Voltage (kV)                                     | 200                                               | 200                                               |
| Electron exposure (e-/Å <sup>2</sup> )           | 53.0                                              | 51.5                                              |
| Defocus range (µm)                               | -0.8 to -1.5                                      | -0.8 to -1.5                                      |
| Pixel size (Å)                                   | 1.66                                              | 1.66                                              |
| Symmetry imposed                                 | C1                                                | C5                                                |
| Initial particle images (no.)                    | 3,159,007                                         | 903,271                                           |
| Final particle images (no.)                      | 326,766                                           | 97,594                                            |
| Map resolution (Å)                               | 3.00                                              | 3.13                                              |
| FSC threshold                                    | 0.143                                             | 0.143                                             |
| Map resolution range (Å)                         | 2.6 to 3.4                                        | 3.0 to 3.7                                        |
| <b>Refinement</b>                                |                                                   |                                                   |
| Initial models used (PDB code)                   | 4RHR, 1MHH, 4H20                                  | 4RHR, 2OZ4, 4M48,                                 |
| Model resolution (Å)                             | 3.00                                              | 3.13                                              |
| FSC threshold                                    | 0.143                                             | 0.143                                             |
| Model resolution range (Å)                       | 2.63 to 3.38                                      | 2.97 to 3.69                                      |
| Map sharpening <i>B</i> factor (Å <sup>2</sup> ) | 83.57                                             | 101.11                                            |
| Model composition                                |                                                   |                                                   |
| Non-hydrogen atoms                               | 6320                                              | 13195                                             |
| Protein residues                                 | 816                                               | 1705                                              |
| Ligands                                          | 0                                                 | 0                                                 |
| <i>B</i> factors (Å <sup>2</sup> )               |                                                   |                                                   |
| Protein                                          | 36.89                                             | 55.14                                             |
| Ligand                                           | 0                                                 | 0                                                 |
| R.m.s. deviations                                |                                                   |                                                   |
| Bond lengths (Å)                                 | 0.003                                             | 0.003                                             |
| Bond angles (°)                                  | 0.517                                             | 0.530                                             |
| Validation                                       |                                                   |                                                   |
| MolProbity score                                 | 1.95                                              | 2.17                                              |
| Clashscore                                       | 8.45                                              | 11.29                                             |
| Poor rotamers (%)                                | 0                                                 | 0                                                 |
| Ramachandran plot                                |                                                   |                                                   |
| Favored (%)                                      | 91.88                                             | 87.82                                             |
| Allowed (%)                                      | 8.12                                              | 12.18                                             |
| Disallowed (%)                                   | 0                                                 | 0                                                 |

**Table S2. PltB amino acid residues known to interact with glycan-receptors, related to Figs. 2-3.**  
 Note that binding pocket BS1 is located on the lateral side of PltB pentamer, whereas binding pockets BS2 and BS3 are located on the bottom side of PltB pentamer.

| Glycan receptors*                                                                        | Methods used         | Residues in BS1**                                     | Residues in BS2**                                        | Residues in BS3**                        | References            |
|------------------------------------------------------------------------------------------|----------------------|-------------------------------------------------------|----------------------------------------------------------|------------------------------------------|-----------------------|
| Neu5Ac                                                                                   | Molecular docking    | Y33, <b>S35</b> , K59                                 |                                                          |                                          | (Song et al., 2013)   |
| Neu5Ac $\alpha$ 2-6Gal $\beta$ 1-4GlcNAc                                                 | Co-crystal structure | Y33, Y34, S35, K59, R100                              |                                                          |                                          | (Lee et al., 2020)    |
| Neu5,9Ac $\alpha$ 2-6Gal $\beta$ 1-4GlcNAc                                               | Co-crystal structure | Y34, S35, K59, T65, R100                              |                                                          |                                          | (Nguyen et al., 2020) |
| Neu5Ac $\alpha$ 2-3Gal $\beta$ 1-4GlcNAc                                                 | Co-crystal structure | Y33, Y34, <b>S35</b> , D36, <b>K59</b> , R100         | Q75, I107, <b>W108</b> , <b>T109</b> , Y110, <b>F113</b> | E24, <b>D28</b> , <b>N29</b> , D48, Y110 | (Lee et al., 2020)    |
| Neu5,9Ac $\alpha$ 2-3Gal $\beta$ 1-4GlcNAc                                               | Co-crystal structure | Y33, Y34, S35, K59, N61, T65, R100                    | Q75, I107, W108, T109, Y110, F113                        |                                          | (Nguyen et al., 2020) |
| Neu4,5Ac $\alpha$ 2-3Gal $\beta$ 1-4GlcNAc                                               | Co-crystal structure | Y33, Y34, S35, D36, K59, T65                          | Q75, W108, T109, Y110                                    |                                          | (Nguyen et al., 2020) |
| GD2 glycan: GalNAc $\beta$ 1-4(Neu5Ac $\alpha$ 2-8Neu5Ac $\alpha$ 2-3)Gal $\beta$ 1-4Glc | Co-crystal structure | <b>Y33</b> , Y34, <b>S35</b> , <b>K59</b> , T65, R100 |                                                          |                                          | (Deng et al., 2014)   |

\* Neu5Ac, N-acetylneuraminic acid; Gal, galactose; GlcNAc, N-acetylglucosamine; Neu5,9Ac $\alpha$ 2, 9-O-acetyl Neu5Ac; Neu4,5Ac $\alpha$ 2, 4-O-acetyl Neu5Ac; GalNAc, N-acetylgalactosamine; Glc, glucose.

\*\* Residues in bold, their importance was experimentally confirmed through mutagenesis studies in references indicated.

**Table S3. Primers used in this study, related to Fig. 1 and STAR Methods.**

| Application           | Primer name           | Forward or reverse              | Primer sequence (5'-3')           |
|-----------------------|-----------------------|---------------------------------|-----------------------------------|
| Reverse transcription | Template-switch oligo | Universal forward primer        | AGGCAGTGGTATCAACGCAGAGTACATGrGrGr |
|                       | mIGK RT               | Reverse primer for kappa chain  | TTGTCGTTCACTGCCATCAATC            |
|                       | mIGL RT               | Reverse primer for lambda chain | GGGTACCATCTACCTTCCAG              |
|                       | mIGHG RT              | Reverse primer for heavy chain  | AGCTGGGAAGGTGTGCACAC              |
| PCR                   | ISPCR                 | Universal forward primer        | AAGCAGTGGTATCAACGCAGAG            |
|                       | mIGK PCR              | Reverse primer for kappa chain  | ACATTGATGTCTTTGGGGTAGAAG          |
|                       | mIGL PCR              | Reverse primer for lambda chain | ATCGTACACACCAGTGTGGC              |
|                       | mIGHG PCR             | Reverse primer for heavy chain  | GGGATCCAGAGTTCCAGGTC              |

GrGrGr: 3 riboguanines. See Meyer et al, 2019 for details (Meyer et al., 2019).

**Table S4. Kinetics of TyTx MAbs binding to typhoid toxin by surface plasmon resonance (SPR) assays, related to Fig. 5.**

| <b>MAb</b> | <b>Isotype</b> | <b>Target</b> | <b><math>k_a</math> (<math>M^{-1}s^{-1}</math>)<sup>a</sup></b> | <b><math>k_d</math> (<math>s^{-1}</math>)<sup>a</sup></b> | <b><math>K_D</math> (<math>M</math>)<sup>a</sup></b> |
|------------|----------------|---------------|-----------------------------------------------------------------|-----------------------------------------------------------|------------------------------------------------------|
| TyTx1      | IgG1           | PltB          | $9.39 \times 10^4$                                              | $6.64 \times 10^{-3}$                                     | $7.11 \times 10^{-8}$                                |
| TyTx3      | IgG1           | PltB          | $1.73 \times 10^5$                                              | $1.68 \times 10^{-2}$                                     | $1.45 \times 10^{-7}$                                |
| TyTx4      | IgG2a          | PltB          | $1.03 \times 10^6$                                              | $6.80 \times 10^{-6}$                                     | $6.70 \times 10^{-12}$                               |

<sup>a</sup> Mean values of three technical replicates.



**Table S5. Secondary structure matching analyses of bacterial AB<sub>5</sub> toxins, related to Fig. 7.**

| Toxin name                                         | Holotoxin PDB | Glycan complex PDB (glycan name) <sup>1</sup>                                 | TyTx1-like IgGs per toxin (shoulder-located epitopes). | TyTx4-like IgGs per toxin (bottom-located epitopes) |
|----------------------------------------------------|---------------|-------------------------------------------------------------------------------|--------------------------------------------------------|-----------------------------------------------------|
| Typhoid toxin (A <sub>2</sub> B <sub>5</sub> )     | 4K6L          | 6P4M (Neu5Acα2-3Galβ1-4GlcNAc)                                                | 1 MAb (2 Fabs)                                         | 3 MAbs (5 Fabs)                                     |
| <i>E. coli</i> PltAB toxin (AB <sub>5</sub> )      | 4Z9C          | Unknown <sup>2</sup>                                                          | 1 MAb (2 Fabs)                                         | 3 MAbs (5 Fabs)                                     |
| Cholera toxin (AB <sub>5</sub> ) <sup>3</sup>      | 1XTC          | 5ELB (Lewis Y glycans); 2CHB (GM1 glycans)                                    | 1 MAb (2 Fabs)                                         | 3 MAbs (5 Fabs)                                     |
| Shiga toxin type 2 (AB <sub>5</sub> ) <sup>4</sup> | 1R4P          | 1BOS (α-D-galactopyranose-(1-4)-β-D-galactopyranose-(1-4)-β-D-glucopyranose). | 2 MAbs (4 Fabs)                                        | 3 MAbs (5 Fabs)                                     |
| Pertussis toxin (AB <sub>5</sub> ) <sup>5</sup>    | 1PRT          | 1PTO (Neu5Acα2-6-β-D-galactopyranose)                                         | 1 MAb (2 Fabs)                                         | 3 MAbs (5 Fabs)                                     |

<sup>1</sup>Additional glycan binding pockets may exist.

<sup>2</sup>Glycan bound structure is unavailable.

<sup>3</sup>Similar to typhoid toxin, glycan-binding pockets are located on both the shoulder and the bottom.

<sup>4</sup>Glycan binding pockets are located on the bottom side of the B pentamer.

<sup>5</sup>Glycan binding pockets on the shoulder regions in S2 and S3. Heteropentameric B subunits consisting of S2, S3, 2S4, and S5 can also be considered as an intrinsic immune subversion mechanism because their epitopes in the B heteropentamer are different.

**Table S6. Comparison of *S. Typhi* *pltB* sequences deposited in NCBI, related to Fig. 6.** Shown are the first 100 hits from the BLAST search using *S. Typhi* CT18 *pltB*. Note that all *S. Typhi* strains encode *pltB* on their chromosomes and their DNA sequences are identical. (Adapted from (Lee et al., 2020))

| Strain Name         | Sequence ID | PltB gene location | Sequence Homology (%) |
|---------------------|-------------|--------------------|-----------------------|
| CT18                | Sty1891     | 1788687-1788274    | 100                   |
| R19_2839            | CP046429.1  | 2684230-2683817    | 100                   |
| 2018K-0756          | CP044007.1  | 2313144-2312731    | 100                   |
| WGS1146             | CP040575.1  | 2684661-2684248    | 100                   |
| Ty2 4316STDY6559669 | LR590081.1  | 2568088-2567675    | 100                   |
| 311189_217186       | CP029646.1  | 1787549-1787136    | 100                   |
| 311189_201186       | CP029958.1  | 1787568-1787155    | 100                   |
| 311189_218186       | CP029925.1  | 1788480-1788067    | 100                   |
| 343078_273110       | CP029846.1  | 1787719-1787306    | 100                   |
| 343078_256191       | CP029959.1  | 1726503-1726090    | 100                   |
| 343078_251131       | CP029960.1  | 1788099-1787686    | 100                   |
| 343078_228140       | CP029962.1  | 1787808-1787395    | 100                   |
| 343078_223175       | CP029964.1  | 1787907-1787494    | 100                   |
| 343078_211126       | CP029848.1  | 1787796-1787383    | 100                   |
| 343078_203125       | CP029850.1  | 1787691-1787278    | 100                   |
| 343078_201101       | CP029852.1  | 1788012-1787599    | 100                   |
| 343077_292148       | CP029855.1  | 1787884-1787471    | 100                   |
| 343077_286126       | CP029856.1  | 1787067-1786654    | 100                   |
| 343077_285138       | CP029858.1  | 1787839-1787426    | 100                   |
| 343077_281186       | CP029853.1  | 1726037-1725624    | 100                   |
| 343077_278127       | CP029863.1  | 1787499-1787086    | 100                   |
| 343077_267164       | CP029906.1  | 1790717-1790304    | 100                   |
| 343077_260153       | CP029861.1  | 1787799-1787386    | 100                   |
| 343077_255118       | CP029907.1  | 1790401-1789988    | 100                   |
| 343077_228157       | CP029864.1  | 1787663-1787250    | 100                   |
| 343077_228140       | CP029866.1  | 1827555-1827142    | 100                   |
| 343077_215174       | CP029868.1  | 1790707-1790294    | 100                   |
| 343077_214162       | CP029862.1  | 1788094-1787681    | 100                   |
| 343077_214135       | CP029872.1  | 1787901-1787488    | 100                   |
| 343077_213147       | CP029897.1  | 1882683-1882270    | 100                   |
| 343077_212159       | CP029870.1  | 1726862-1726449    | 100                   |
| 343077_212138       | CP029919.1  | 1790394-1789981    | 100                   |
| 343077_211171       | CP029873.1  | 1787670-1787257    | 100                   |
| 343076_294172       | CP029888.1  | 1788337-1787924    | 100                   |
| 343076_269157       | CP029881.1  | 1827552-1827139    | 100                   |
| 343076_253155       | CP029890.1  | 1827830-1827417    | 100                   |
| 343076_252143       | CP029892.1  | 1787952-1787539    | 100                   |
| 343076_249107       | CP029913.1  | 1787807-1787394    | 100                   |
| 343076_248190       | CP029882.1  | 1789926-1789513    | 100                   |
| 343076_241106       | CP029899.1  | 1790429-1790016    | 100                   |

|                                |            |                 |            |
|--------------------------------|------------|-----------------|------------|
| 343076_232188                  | CP029900.1 | 1787868-1787455 | <b>100</b> |
| 343076_227128                  | CP029875.1 | 1787865-1787452 | <b>100</b> |
| 311189_282186                  | CP029920.1 | 1787761-1787348 | <b>100</b> |
| 343076_217103                  | CP029914.1 | 1790493-1790080 | <b>100</b> |
| 343076_202113                  | CP029915.1 | 1787839-1787426 | <b>100</b> |
| 311189_291186                  | CP029894.1 | 1787546-1787133 | <b>100</b> |
| 311189_269186                  | CP029922.1 | 1787670-1787257 | <b>100</b> |
| 311189_268186                  | CP029883.1 | 1787273-1786860 | <b>100</b> |
| 311189_268103                  | CP029902.1 | 1832789-1832376 | <b>100</b> |
| 311189_256186                  | CP029917.1 | 1787985-1787572 | <b>100</b> |
| 311189_255186                  | CP029885.1 | 1787948-1787535 | <b>100</b> |
| 311189_252186                  | CP029896.1 | 1787765-1787352 | <b>100</b> |
| 311189_239103                  | CP029908.1 | 1789500-1789087 | <b>100</b> |
| 311189_232103                  | CP029918.1 | 1789005-1788592 | <b>100</b> |
| 311189_231186                  | CP029904.1 | 1787588-1787175 | <b>100</b> |
| 311189_224186                  | CP029878.1 | 1787585-1787172 | <b>100</b> |
| 311189_223186                  | CP029880.1 | 1788850-1788437 | <b>100</b> |
| 311189_222186                  | CP029909.1 | 1828203-1827790 | <b>100</b> |
| 311189_221186                  | CP029923.1 | 1787191-1786778 | <b>100</b> |
| 311189_220186                  | CP029886.1 | 1787992-1787579 | <b>100</b> |
| 311189_219186                  | CP029911.1 | 1787778-1787365 | <b>100</b> |
| 311189_217103                  | CP029927.1 | 1789682-1789269 | <b>100</b> |
| 311189_216103                  | CP029928.1 | 1828252-1827839 | <b>100</b> |
| 311189_215186                  | CP029930.1 | 1787043-1786630 | <b>100</b> |
| 311189_214186                  | CP029933.1 | 1787624-1787211 | <b>100</b> |
| 311189_213186                  | CP029936.1 | 1787792-1787379 | <b>100</b> |
| 311189_212186                  | CP029944.1 | 1788004-1787591 | <b>100</b> |
| 311189_211186                  | CP029945.1 | 1790441-1790028 | <b>100</b> |
| 311189_210186                  | CP029946.1 | 1787772-1787359 | <b>100</b> |
| 311189_209186                  | CP029952.1 | 1787691-1787278 | <b>100</b> |
| 311189_208186                  | CP029949.1 | 1787768-1787355 | <b>100</b> |
| 311189_208103                  | CP029932.1 | 1788052-1787639 | <b>100</b> |
| 311189_207186                  | CP029938.1 | 1726111-1725698 | <b>100</b> |
| 311189_206186                  | CP029940.1 | 1789029-1788616 | <b>100</b> |
| 311189_205186                  | CP029950.1 | 1787384-1786971 | <b>100</b> |
| 311189_204186                  | CP029954.1 | 1787710-1787297 | <b>100</b> |
| 311189_203186                  | CP029942.1 | 1787052-1786639 | <b>100</b> |
| 311189_202186                  | CP029956.1 | 1827716-1827303 | <b>100</b> |
| Ty21a                          | CP023975.1 | 2176424-2176837 | <b>100</b> |
| LXYSH                          | CP030936.1 | 4243329-4243742 | <b>100</b> |
| OVG_041                        | LT906560.1 | 516042-515629   | <b>100</b> |
| SGB90                          | LT904870.2 | 2806254-2805841 | <b>100</b> |
| ISP_03_07467_SGB110-sc-1979083 | LT905060.2 | 2662091-2661678 | <b>100</b> |
| 1036491                        | LT906495.1 | 2657594-2657181 | <b>100</b> |

|                         |            |                 |            |
|-------------------------|------------|-----------------|------------|
| ERL024120               | LT906494.1 | 509382-509795   | <b>100</b> |
| 1554-sc-2165329         | LT906493.1 | 2657605-2657192 | <b>100</b> |
| E98_3139-sc-1927833     | LT905143.1 | 2366618-2367031 | <b>100</b> |
| H12ESR00755-001A        | LT905142.1 | 369292-368879   | <b>100</b> |
| OVG_041                 | LT905141.1 | 1896510-1896923 | <b>100</b> |
| ERL082356               | LT905140.1 | 2441262-2441675 | <b>100</b> |
| 2010-007898             | LT905139.1 | 2657610-2657197 | <b>100</b> |
| ty3-243                 | LT905090.1 | 4566056-4566469 | <b>100</b> |
| ERL024120               | LT905088.1 | 1520236-1520649 | <b>100</b> |
| 1554-sc-2165329         | LT905064.1 | 2657555-2657142 | <b>100</b> |
| lupe_GEN0059-sc-1979081 | LT905063.1 | 2072707-2073120 | <b>100</b> |
| 403Ty-sc-1979084        | LT905062.1 | 4644368-4644781 | <b>100</b> |
| ERL12960                | LT904894.1 | 2657509-2657096 | <b>100</b> |
| 1016889                 | LT904893.1 | 2657582-2657169 | <b>100</b> |
| 80-2002                 | LT904891.1 | 4585640-4586053 | <b>100</b> |
| H12ESR00394-001A        | LT904890.1 | 2060046-2060459 | <b>100</b> |
| 129-0238-M              | LT904888.1 | 4564955-4565368 | <b>100</b> |

---
